# Supplementary material for: Adipose tissue-derived stem cell therapy in rat cryopreserved ovarian grafts
Source: PubMed Central journal article supplement (PMC4416311; doi:10.1186/s13287-015-0068-3), 2015-04-15
Supplement: 13287_2015_68_MOESM2_ESM.pdf [file 13287_2015_68_MOESM2_ESM.pdf]

## Ovarian cryopreservation

The whole ovaries were placed in 1.2ml-cryovials (Sigma-Aldrich®, Inc.) in M2 medium plus HEPES without Penicilin and Streptomycin (M2-Sigma-Aldrich®, Inc.) and with 1.4M dimethyl sulfoxide (DMSO) (Sigma-Aldrich®, Inc.) as a cryoprotector and were held at room temperature for 5 min. The cryovials were sealed by twisting their caps and were placed in a temperature-programmed freezer (CL-8800, Cryogenesis software, Freezer Control) and cooled from 25°C to 10°C at a rate of 1°C/min, then to -7°C at a rate of 0.5°C/min, and maintained at -7°C for 5 min. Then, ice nucleation was manually induced using pre-cooled forceps, and the temperature was held at -7°C for another 5 min to allow for the release of latent heat fusion. The tissue was then frozen at -55°C at a rate of 0,5°C/min, plunged into liquid nitrogen at -196°C and stored for 24 hours.

For thawing, cryovials were removed from liquid nitrogen and held at room temperature until the ice melted. The ovaries were washed two times for 5 min in fresh M2 medium, then shaken gently to remove the cryoprotectant before further processing. The ovaries were maintained in M2 at room temperature until the transplant.
